# Supplementary material for: Relative Importance of Modularity and Other Morphological Attributes on Different Types of Lithic Point Weapons: Assessing Functional Variations
Source: PLoS One. 2012 Oct 19;7(10):e48009. doi: 10.1371/journal.pone.0048009 (PMC3477140; doi:10.1371/journal.pone.0048009)
Supplement: Table S1 — Further details concerning each point. Classification under the Bird's system, qualitative and quantitative data regarding point's size, IBS, TA and asymmetry. (XLSX) [file pone.0048009.s001.xlsx]

## Sheet: Supp Table 1
ID	Bird's classification	Centroid Size	Index Blade/Stem	Tip Angle	Mahalanobis Fluctuating Assymetry
0bis	Bird V	101.009	2.97618	69.6083	4.29024
111bis	Bird V	509.149	4.1494	51.9343	4.43619
1000	Bird IV	179.124	1.3519	93.1067	5.8587
130	Bird IV	166.934	0.981128	107.576	4.24313
00bis	Bird IV	312.531	2.96785	70.52	3.10994
1bis	Bird IV	255.963	3.19417	86.5296	4.25293
2bis	Bird IV	340.39	3.61701	60.8826	4.71353
22	Bird IV	444.134	2.59003	75.2108	3.49017
23	Bird IV	558.284	2.31768	65.4483	4.27938
24	Bird V	320.654	3.24846	46.8776	5.07681
25	Bird V	295.977	4.71712	54.3024	2.90979
26	Bird V	224.894	2.68219	61.6822	4.7006
27	Bird IV	394.139	5.94583	50.8967	4.45055
28	Bird IV	316.775	2.35007	55.7062	3.21483
29	Bird IV	231.385	2.10244	66.4377	4.85374
30	Bird V	345.854	7.94045	46.9198	4.34327
31	Bird V	763.913	1.97352	78.5604	5.09995
32	Bird IV	1417.66	1.92336	70.8717	6.54849
33	Bird IV	1218.29	2.24273	94.2535	4.31282
34	Bird IV	1214.46	1.58929	87.2895	4.08579
35	Bird IV	1051.21	1.92519	81.5441	5.02387
36	Bird IV	1702.66	1.5763	78.4122	5.43139
37	Bird IV	1559.26	2.10725	81.0996	6.89635
38	Bird IV	1084.86	2.17091	92.1037	3.60474
39	Bird IV	1548.96	1.93457	93.7993	4.04304
40	Bird IV	1110.07	0.701623	124.487	4.70641
41	Bird IV	1097.18	1.69622	97.4153	3.90296
42	indet	571.198	3.0732	67.627	4.21006
43	Bird IV	457.977	2.33296	68.1273	5.14539
44	Bird IV	457.906	2.31353	85.5793	4.84463
45	Bird V	402.771	4.04566	50.2381	4.72927
46	Bird IV	496.987	2.41226	62.7529	4.40383
47	Bird V	318.999	2.96554	60.4656	3.98775
48	Bird IV	455.213	1.78035	75.8411	4.42497
49	indet	472.546	2.01491	83.263	5.54863
50	Bird IV	319.121	3.73907	49.5079	3.54912
51	Bird V	120.126	3.0044	42.1953	5.82369
52	Bird V	133.355	3.86885	46.3915	5.48831
53	Bird IV	210.123	2.27506	68.0277	5.58549
54	Bird IV	314.108	2.87631	73.8431	5.5183
55	Bird IV	287.635	1.50575	99.6231	9.56133
56	Bird IV	334.29	1.88789	85.1306	4.07779
57	Bird IV	304.617	2.34001	72.1833	5.72557
58	Bird IV	90.7908	3.16722	59.7243	5.07859
59	Bird IV	82.3043	2.33291	67.1902	4.45331
60	Bird IV	122.754	2.98867	80.8138	5.65226
61	Bird IV	122.146	3.31474	62.1716	4.47615
62	Bird IV	114.596	2.92797	77.5849	4.64118
63	Bird IV	128.236	2.92889	71.431	3.79053
64	Bird IV	131.253	4.29944	54.1889	5.3932
65	Bird IV	139.296	2.03269	71.0619	3.95377
66	Bird IV	136.523	2.58584	69.1857	5.16875
67	Bird IV	142.197	3.60629	57.2893	4.44438
68	Bird IV	137.912	2.56391	50.1966	6.35363
69	Bird IV	118.186	1.90067	81.9021	4.63735
70	Bird IV	122.511	1.62922	91.1728	5.55664
71	Bird IV	127.17	2.23114	81.892	4.58776
72	Bird IV	120.928	2.25597	94.6089	3.9432
73	Bird IV	105.107	1.20958	121.071	5.8171
74	Bird IV	121.126	2.44707	92.0412	3.8018
75	Bird IV	116.763	1.87338	90.8282	4.55575
76	Bird IV	112.994	2.28269	70.5151	4.50999
77	Bird IV	112.198	2.33949	85.875	6.22381
78	Bird IV	110.783	1.90188	78.2017	5.1016
79	Bird IV	129.536	1.76101	77.2231	4.40705
80	Bird IV	125.343	2.22973	79.1218	3.93544
81	Bird IV	109.396	2.61282	73.5988	4.66573
82	Bird IV	103.335	2.36639	103.635	4.63239
83	Bird IV	113.62	3.35668	69.6669	3.3808
84	Bird IV	97.9359	2.71479	77.2584	3.88851
85	Bird IV	102.88	2.54746	72.5595	5.7243
86	Bird IV	101.189	2.9254	57.9306	5.58301
87	Bird IV	118.082	3.30297	49.0228	4.52032
88	Bird IV	123.418	4.49019	50.5116	4.61995
89	Bird IV	83.4811	2.07157	73.3971	5.21126
90	Bird V	223.996	2.28032	73.7947	3.85359
91	Bird V	319.795	4.43726	43.7074	4.43796
92	Bird V	293.712	3.83409	45.5436	3.59032
93	Bird V	241.644	2.81781	55.2378	3.91357
94	Bird V	331.344	6.0683	37.2318	4.40622
95	Bird V	249.342	4.48761	52.1983	4.83067
96	Bird V	298.575	3.04852	74.5372	5.58384
97	Bird V	241.47	3.52187	43.1342	4.11936
98	Bird IV	135.413	2.24369	56.7001	2.967
99	Bird IV	227.075	2.54894	90.6887	4.1988
100	Bird IV	315.169	3.16149	44.7483	3.7848
101	Bird IV	281.858	1.54728	98.8964	2.95419
102	Bird IV	261.423	1.27065	98.3899	4.86639
103	Bird IV	230.444	2.72294	84.3222	4.7939
104	Bird IV	249.964	1.61073	106.822	3.71595
105	Bird IV	270.702	1.57398	96.046	3.89593
106	Bird IV	259.617	1.19147	120.372	4.90443
107	Bird V	181.971	3.97661	41.1637	3.88639
108	Bird IV	332.634	2.88832	65.2364	4.49474
109	Bird IV	97.4505	2.58735	61.3555	3.9541
110	Bird IV	58.4249	0.984875	116.923	4.5035
111	Bird IV	94.8931	2.6634	49.9768	3.85296
112	Bird IV	281.853	2.58701	84.2034	3.78604
113	Bird IV	269.812	1.64365	94.8589	5.58625
114	Bird IV	200.784	4.17427	73.3339	5.16471
115	Bird V	174.538	5.67837	47.1884	5.27658
116	Bird IV	251.194	1.64709	104.709	4.24669
117	Bird IV	367.131	2.63571	74.467	4.77909
118	Bird IV	92.4206	1.42753	103.301	4.83694
119	Bird V	108.28	7.54685	36.3306	3.68828
120	Bird V	90.1126	6.78107	47.2252	3.5708
121	Bird IV	127.261	1.88185	91.9748	3.77791
122	Bird IV	138.402	2.30143	70.8063	4.16916
123	Bird IV	125.149	2.0874	88.2319	5.23187
124	Bird IV	108.656	2.23737	85.587	3.1347
125	Bird V	96.6408	2.42669	56.2718	4.95299
126	Bird IV	95.8473	2.706	63.8345	4.04698
127	Bird IV	143.433	2.96011	60.0234	3.31404
0	Bird V	302.207	9.1444	36.8592	4.12728
1	Bird V	292.155	5.74611	48.851	4.71793
10bis	Bird IV	241.009	1.94303	73.3912	4.17871
11	Bird IV	237.279	2.65664	52.2772	5.09416
2	Bird V	98.2455	3.2114	50.806	4.17045
